# Supplementary material for: Identification of two-dimensional copper signatures in human blood for bladder cancer with machine learning
Source: Royal Society of Chemistry journal article supplement (doi:10.1039/d1sc06156a), 2022-01-01
Supplement: d1sc06156a1.pdf [file d1sc06156a1.pdf]

## SUPPORTING INFORMATION

for

# Identification of Two-Dimensional Copper Signatures in Human Blood for Bladder Cancer with Machine Learning

Weichao Wang,<sup>[a,h]#</sup> Xian Liu,<sup>[a]#</sup> Changwen Zhang,<sup>[b]</sup> Fei Sheng,<sup>[b]</sup> Shanjun Song,<sup>[c]</sup> Penghui Li,<sup>[d]</sup> Shaoqing Dai,<sup>[e]</sup> Bin Wang,<sup>[f]</sup> Dawei Lu,<sup>[a,h]</sup> Luyao Zhang,<sup>[a,h]</sup> Xuezhi Yang,<sup>[a,h]</sup> Zhihong Zhang,<sup>[b]</sup> Sijin Liu,<sup>[a]</sup> Aiqian Zhang,<sup>[a,h]</sup> Qian Liu<sup>[a,g,h]\*</sup> and Guibin Jiang<sup>[a,h]</sup>

<sup>[a]</sup> State Key Laboratory of Environmental Chemistry and Ecotoxicology, Research Center for Eco-Environmental Sciences, Chinese Academy of Sciences, Beijing 100085, China

<sup>[b]</sup> Department of Urology, The Second Hospital of Tianjin Medical University, Tianjin Institute of Urology, Tianjin 300211, China

<sup>[c]</sup> National Institute of Metrology, Beijing 100029, China

<sup>[d]</sup> Tianjin University of Technology, Tianjin 300384, China

<sup>[e]</sup> Faculty of Geo-Information Science and Earth Observation (ITC), University of Twente, P.O. Box 217, 7500AE Enschede, The Netherlands

<sup>[f]</sup> Institute of Reproductive and Child Health, National Health Commission's Key Laboratory of Reproductive Health, Peking University, Beijing 100191, China

<sup>[g]</sup> Institute of Environment and Health, Jiangnan University, Wuhan 430056, China

<sup>[h]</sup> University of Chinese Academy of Sciences, Beijing 100049, China

# These authors contributed equally.

\* Corresponding author: Qian Liu. Email: [qianliu@rcees.ac.cn](mailto:qianliu@rcees.ac.cn)

## Contents

1. Experimental Section
2. Supplementary Discussion
3. Supplementary Tables
4. Supplementary Figures
5. References for SI

## 1. Experimental Section

### Chemicals and Reagents

Nitric acid was purchased from Merck (Darmstadt, Germany). Hydrochloric acid was from Beijing Chemicals Works (Beijing, China). Sub-boiled distilled nitric acid, hydrochloric acid, and water were produced by a distilling apparatus. Hydrogen peroxide (30%) was from Sinopharm Chemical Reagent Co. (Shanghai, China). Ultrapure water (18.2 MΩ·cm) was produced from a Milli-Q Gradient system (Millipore, Bedford). The copper isotopic standard material ERM-AE633 was purchased from the Institute for Reference Materials and Measurements (GEEL, Belgium), and another standard material CAGS-Cu was provided by Chinese Academy of Geological Sciences (Beijing, China). The element calibration standard solution for ICP-MS was from Agilent (Santa Clara, CA). No unexpected or unusually high safety hazards were encountered.

### Study participants

All blood samples of BCa patients ( $n = 41$ ) and benign patients ( $n = 17$ ) were collected in the Second Hospital of Tianjin Medical University during 2013-2015 (Tianjin, China). The BCa group included different types, malignancy grades, and cancer stages. The benign diseases included cystitis, benign prostatic hyperplasia, ureteral calculus, renal calculus, vesical calculus, renal hamartoma, renal cyst, adrenal cortical adenoma, stress incontinence, and bladder mucosa mild epithelial dysplasia. The patients were classified by clinical diagnosis. The blood samples of healthy subjects were collected around the Tianjin city, China. Thirty age-matched healthy adults ( $n = 30$ ) and eighteen healthy young adults were recruited ( $n = 18$ ). The healthy subjects presented no clinical evidence of diseases. The demographics of all study participants are given in Table S1, and the blood biochemical indexes of patients and healthy subjects are given in Table S6-S8. Ultra-clean disposable devices were used for sample collection. After collection, the blood samples were immediately separated into plasma and red blood cells (RBC) by centrifugation and stored separately at -80 °C in the dark before analysis.

All participants provided informed consent, and the study protocol was approved by the Ethics Committee of the Second Hospital of Tianjin Medical University (No. KY2018K082) and compliant with all relevant ethical regulations for studies involving human subjects.

### **Sample preparation**

The sample preparation procedure included two steps, digestion and isolation of target element. For digestion, 1 mL of plasma or RBC sample was transferred to a Teflon tube containing 7.5 mL of 14 M HNO<sub>3</sub> and 1 mL of 30% H<sub>2</sub>O<sub>2</sub>. The mixture was completely digested in a microwave reaction system (Anton Paar). After that, the sample was put in a Teflon beaker followed by heating to dryness, and the residue was redissolved with 8 M HCl/0.001% H<sub>2</sub>O<sub>2</sub> to 1 mL.

For MC-ICP-MS analysis of copper isotopes, we used an anion exchange chromatographic method to purify the digested samples as reported previously.<sup>1</sup> AG-MP-1M anion exchange resin (Bio-Rad, 100-200 mesh) was activated for more than 12 h prior to use. The resin (1.8 mL) was loaded into a Bio-Rad column, and 10 mL of 0.7 M HNO<sub>3</sub> and 10 mL of H<sub>2</sub>O were used to clean the resin. Then, 10 mL of 8 M HCl/0.001% H<sub>2</sub>O<sub>2</sub> was loaded onto the top of resin bed. After that, the sample solution was loaded to the column. The elution was performed as follows: 8 mL of 8 M HCl/0.001% H<sub>2</sub>O<sub>2</sub> for elution of matrix, 12 mL of 5 M HCl/0.001% H<sub>2</sub>O<sub>2</sub> for elution of copper, 7 mL of 0.6 M HCl for elution of Fe, and finally 8 mL of 0.7 M HNO<sub>3</sub> for elution of Zn. As shown in Fig. S5, the elution curve indicates that those elements could be fully separated from interfering ions and collected in different fractions. In order to eliminate the interference from Cl ions during MC-ICP-MS analysis, the copper fraction was evaporated to dryness at 100 °C and redissolved in 0.7 M HNO<sub>3</sub>, and this step was repeated twice. A copper isotopic standard sample in HNO<sub>3</sub> and 30% H<sub>2</sub>O<sub>2</sub> was analyzed by the same procedures to ensure that no copper isotopic fractionation was caused by the sample preparation process. The recovery of copper during the whole sample preparation process was > 95%.

### **Measurement of Cu concentration and isotopic ratios**

The copper concentration was measured by an Agilent 8800 inductively coupled plasma mass spectrometer (Santa Clara, CA, USA). For copper isotopic ratio measurement, a Nu Plasma II

MC-ICP-MS (Wrexham, UK) equipped with 16 Faraday cups was used. The sample was injected in wet mode with a peristaltic pump at a rate of 8 rpm. The optimized instrumental parameters and Faraday cup configuration are given in Table S10. The copper isotopic ratio ( $^{65}\text{Cu}/^{63}\text{Cu}$ , expressed as  $\delta^{65}\text{Cu}$  value in permil) was expressed relative to a standard material (ERM-AE633):

$$\delta^{65}\text{Cu} = \left( \frac{(^{65}\text{Cu}/^{63}\text{Cu})_{\text{sample}}}{(^{65}\text{Cu}/^{63}\text{Cu})_{\text{standard}}} - 1 \right) \times 1000\text{‰} \quad (1)$$

Since samples have the equal concentration compared with standard ( $\pm 10\%$  range) and the biological matrix effect was verified to be slight, the standard-sample-standard bracketing (SSB) method was adopted to correct the mass bias.<sup>2-4</sup> The  $\delta^{65}\text{Cu}$  value of sample was calculated based on the results of two adjacent standards. The method was validated by two standard materials, ERM-AE633 and CAGS-Cu. The  $\delta^{65}\text{Cu}$  value of CAGS-Cu relative to ERM-AE633 was  $0.57 \pm 0.1\text{‰}$  ( $n = 3$ ). This value was very close to that reported in the previous literature ( $0.57 \pm 0.06\text{‰}$  in Ref. 5 and  $0.54 \pm 0.07\text{‰}$  in Ref. 4),<sup>4,5</sup> proving that this method is highly accurate and precise. It is noteworthy that some reference materials of biological origins have been reported recently,<sup>6</sup> and inclusion of such materials in Cu isotopic analysis may further enhance the precision in future studies.

### **Evaluation of biological matrix effect in copper isotopic analysis**

The experiments were carried out as follows: first, the biological samples were digested and purified by anion exchange column as described above. Then, all the eluted fractions were collected and combined again except for the copper fraction. In this way, we obtained a copper-excluded sample that had the same composition with the original one but with no copper. After that, an ERM-AE633 copper standard solution was added to the copper-excluded sample to obtain a final copper concentration of  $\sim 1 \mu\text{g/mL}$ . The mixture was purified and analyzed again as described above. The results are given in Fig. S2. It can be seen that no significant influence on the copper isotopic measurement caused by the sample matrix was found in the present study.

### **Machine learning model**

Random forest (RF) is an ensemble supervised learning method that fits a number of

individual decision tree classifiers on sub-samples of the whole dataset. Each individual tree in the RF yields a class prediction and the class selected by most trees is the output of the random forest.<sup>7</sup> Such an ensemble strategy not only increases the performance but also reduces the risk of overfitting compared with single decision tree. Therefore, RF algorithm is particularly suitable for the problems with low data volumes. In this study, a RF classification model based on a total of 88 samples (41 BCa and 47 non-BCa participants) was established, where each sample was represented by a vector of four copper-related variables (i.e., plasma copper concentration, RBC copper concentration, plasma  $\delta^{65}\text{Cu}$  value, and RBC  $\delta^{65}\text{Cu}$  value). The leave one out cross-validation (LOOCV) was used to estimate the performance of RF classifier. During the training process, each sample was used once as a test set while the remaining 87 samples formed the training set. In this way, a total of 88 models have been constructed, and the overall precision, recall (also referred to as sensitivity or TPR (true positive rate)), TNR (true negative rate, also referred to as specificity), FPR (false positive rate, also referred to as 1-specificity), and accuracy were calculated by combining predicted label of the tested sample in each fold. The calculation of these metrics was defined as follows. Besides, the area under the receiver operator characteristic curve (AUC-ROC), an overall diagnostic accuracy, was adopted to summarize the trade-off between sensitivity and TNR for every possible cut-off for a combination of tests. Variable importance was computed as the total reduction of the criterion brought by the variables, known as the Gini importance. The t-SNE, RF model, and evaluation process were implemented by an open-source machine learning library scikit-learn in Python 2.7.

$$Precision = \frac{TP}{TP + FP} \quad (2)$$

$$Recall = \frac{TP}{TP + FN} \quad (3)$$

$$FPR = \frac{FP}{FP + TN} \quad (4)$$

$$Specificity = TNR = \frac{TN}{FP + TN} \quad (5)$$

$$Accuracy = \frac{TP + TN}{TP + TN + FP + FN} \quad (6)$$

where TP, FP, TN, and FN denote the number of true positives, the number of false positives, the number of true negatives, and the number of false negatives, respectively.

### **Statistical analysis**

Before doing  $P$  value calculations, we carried out normal distribution test and homogeneity test of variance. We employed Mann Whitney test for  $P$  value calculation when the dataset did not conform to normal distribution. If the dataset conformed to normal distribution and passed the homogeneity test of variance, we employed the unpaired Student's two-tailed  $t$ -test for  $P$  value calculation. If the dataset did not pass the homogeneity test of variance, we employed Welch's  $t$ -test for  $P$  value calculation.<sup>8-10</sup>

### **Data and code availability**

The data that support the findings of this study are given in this supporting material or available from the corresponding authors upon reasonable request. The codes that support the findings of this study are available from the corresponding author upon reasonable request. All analyses were conducted with built-in and freely available R packages.

## 2. Supplementary Discussion

### Comprehensive correlation analysis of multiple factors.

To gain more information on copper metabolic imbalance of BCa patients, we performed a comprehensive correlation analysis of multiple factors (including blood metals and biochemical indexes) (Fig. S3). We mainly paid attention to the data with Pearson correlation coefficient ( $R$ ) greater than 0.3 or less than -0.3 ( $R > 0.3$  or  $R < -0.3$ ) and the  $P$  value less than 0.05 ( $P < 0.05$ , marked with asterisks). When taking the three groups together (Fig. S3a), generally, there was no significant correlation between biochemical indexes and blood copper concentration or  $\delta^{65}\text{Cu}$  value. The copper concentration and  $\delta^{65}\text{Cu}$  value in plasma were positively correlated with those in RBC, indicating that the copper in plasma and RBC should have some common sources. The plasma and RBC  $\delta^{65}\text{Cu}$  values were negatively correlated with age, but this correlation did not exist in BCa patients (Fig. S3d). This result accorded with that in Fig. 2I-2J, i.e., BCa might cover up the effect of age on the blood copper.

In the age-matched healthy group (Fig. S3b), the positive correlation between copper and zinc concentration in both plasma and RBC could be ascribed to the abundant presence of Cu-Zn binding protein SOD1 in blood.<sup>11</sup> In the BCa group (Fig. S3d), however, the Cu-Zn correlation was only present in RBC but absent in plasma. The plasma and RBC  $\delta^{65}\text{Cu}$  values were negatively correlated with the plasma zinc but positively correlated with the RBC zinc (Fig. S3d). This meant that the negative shift in the blood  $\delta^{65}\text{Cu}$  value of BCa patients should be accompanied with the down-regulation of SOD1 in RBC. As an important Cu-Zn storage protein, SOD1 was  $^{65}\text{Cu}$ -depleted relative to blood.<sup>12</sup> Thus, the release of copper from SOD1 could cause a depletion of  $^{65}\text{Cu}$  in plasma relative to RBC. This suggested that the storage processes of copper might also contribute to the BCa-induced copper isotopic fractionation, which needs further evidence in future studies.

### 3. Supplementary Tables

**Table S1. Demographics, copper concentration, and  $\delta^{65}\text{Cu}$  values in blood for study participants.** <sup>a</sup>

|                                            | BCa patients     | Benign patients  | Age-matched healthy control <sup>b</sup> | Young healthy control <sup>c</sup> |
|--------------------------------------------|------------------|------------------|------------------------------------------|------------------------------------|
| Age (mean $\pm$ SD)                        | 65.8 $\pm$ 8.7   | 59.1 $\pm$ 14.1  | 57.5 $\pm$ 6.7                           | 21.3 $\pm$ 4.5                     |
| Gender (male/female)                       | 28/13            | 11/6             | 15/15                                    | 9/9                                |
| Copper in plasma ( $\mu\text{g/g}$ )       | 0.93 $\pm$ 0.26  | 1.41 $\pm$ 0.58  | 1.50 $\pm$ 0.72                          | 0.36 $\pm$ 0.22                    |
| $\delta^{65}\text{Cu}$ value in plasma (‰) | -0.57 $\pm$ 0.73 | -0.06 $\pm$ 0.31 | 0.07 $\pm$ 0.23                          | -                                  |
| Copper in RBC ( $\mu\text{g/g}$ )          | 0.69 $\pm$ 0.14  | 0.91 $\pm$ 0.36  | 0.76 $\pm$ 0.55                          | 0.23 $\pm$ 0.11                    |
| $\delta^{65}\text{Cu}$ value in RBC (‰)    | 0.25 $\pm$ 0.74  | 0.76 $\pm$ 0.68  | 1.39 $\pm$ 0.38                          | -                                  |

<sup>a</sup> See Supplementary Table S2-S8 for detailed information.

<sup>b</sup> Age-matched healthy control means the healthy subjects who have a similar age range with BCa patients.

<sup>c</sup> Young healthy control means the healthy subjects with a lower age range.



**Table S2. Elemental concentrations and  $\delta^{65}\text{Cu}$  values in plasma and RBC for BCa patients.**

| ID | Plasma                      |                               |                     |                             |                             |                             | RBC                         |                               |                     |                             |                             |                             |
|----|-----------------------------|-------------------------------|---------------------|-----------------------------|-----------------------------|-----------------------------|-----------------------------|-------------------------------|---------------------|-----------------------------|-----------------------------|-----------------------------|
|    | [Cu]<br>( $\mu\text{g/g}$ ) | $\delta^{65}\text{Cu}$<br>(‰) | SD<br>( $n = 1-6$ ) | [Fe]<br>( $\mu\text{g/g}$ ) | [Mg]<br>( $\mu\text{g/g}$ ) | [Zn]<br>( $\mu\text{g/g}$ ) | [Cu]<br>( $\mu\text{g/g}$ ) | $\delta^{65}\text{Cu}$<br>(‰) | SD<br>( $n = 1-4$ ) | [Fe]<br>( $\mu\text{g/g}$ ) | [Mg]<br>( $\mu\text{g/g}$ ) | [Zn]<br>( $\mu\text{g/g}$ ) |
| 1  | 1.01                        | -0.55                         | 0.09                | 3.60                        | 22.9                        | 2.20                        | 0.67                        | 0.45                          | 0.25                | 648                         | 45.7                        | 11.1                        |
| 2  | 1.20                        | -0.66                         | 0.07                | 2.80                        | 25.0                        | 3.55                        | 0.74                        | -0.65                         | 0.18                | 429                         | 35.3                        | 8.10                        |
| 3  | 0.75                        | -0.56                         | 0.13                | 3.14                        | 17.5                        | 2.75                        | 0.70                        | 0.10                          | 0.06                | 613                         | 56.8                        | 8.58                        |
| 4  | 0.74                        | -0.80                         | 0.13                | 8.72                        | 19.6                        | 1.53                        | 0.78                        | 0.15                          | 0.05                | 806                         | 50.2                        | 11.2                        |
| 5  | 0.98                        | -0.75                         | 0.30                | 5.01                        | 21.4                        | 2.68                        | 0.67                        | -0.10                         | 0.16                | 735                         | 42.2                        | 10.3                        |
| 6  | 0.61                        | -0.67                         | 0.19                | 3.48                        | 19.1                        | 1.53                        | 0.65                        | -0.33                         | -                   | 743                         | 40.7                        | 10.5                        |
| 7  | 1.30                        | -1.63                         | 0.25                | 6.34                        | 21.6                        | 3.41                        | 0.80                        | -0.86                         | 0.21                | 588                         | 36.8                        | 11.7                        |
| 8  | 0.56                        | -1.39                         | 0.15                | 21.7                        | 15.9                        | 1.97                        | 0.58                        | -2.03                         | 0.13                | 632                         | 35.1                        | 11.0                        |
| 9  | 0.71                        | -1.49                         | 0.01                | 7.75                        | 18.7                        | 1.55                        | 0.89                        | 1.09                          | 0.25                | 396                         | 33.8                        | 7.9                         |
| 10 | 0.69                        | -1.23                         | 0.25                | 7.95                        | 21.5                        | 3.76                        | 0.58                        | -0.42                         | 0.06                | 338                         | 32.2                        | 6.14                        |
| 11 | 0.66                        | -1.71                         | 0.08                | 7.52                        | 21.0                        | 4.92                        | 0.59                        | -0.71                         | -                   | 89.3                        | 23.8                        | 2.94                        |
| 12 | 0.55                        | -2.53                         | 0.35                | 10.5                        | 21.8                        | 4.67                        | 0.45                        | -                             | -                   | 816                         | 48.1                        | 10.3                        |
| 13 | 0.87                        | 0.03                          | 0.08                | 3.86                        | 20.3                        | 2.52                        | 0.79                        | -0.50                         | 0.01                | 69.8                        | 23.9                        | 3.82                        |
| 14 | 0.64                        | 0.79                          | 0.23                | 15.7                        | 20.8                        | 2.04                        | 0.53                        | -0.18                         | -                   | 894                         | 41.9                        | 14.8                        |
| 15 | 1.17                        | 0.90                          | 0.67                | 11.3                        | 21.1                        | 2.20                        | 0.80                        | 1.17                          | 0.04                | 526                         | 34.4                        | 8.82                        |
| 16 | 1.28                        | -0.62                         | 0.15                | 3.35                        | 15.4                        | 0.94                        | 0.68                        | 2.23                          | 0.01                | 885                         | 51.2                        | 10.8                        |
| 17 | 0.97                        | 0.59                          | 0.01                | 3.11                        | 21.0                        | 1.99                        | 0.45                        | 0.65                          | -                   | 874                         | 43.2                        | 11.5                        |
| 18 | 0.59                        | 0.51                          | 0.11                | 2.90                        | 19.8                        | 1.88                        | 0.69                        | 1.40                          | 0.09                | 859                         | 44.3                        | 12.5                        |
| 19 | 0.78                        | 0.10                          | 0.15                | 6.12                        | 21.5                        | 1.29                        | 0.64                        | 0.47                          | -                   | 790                         | 52.0                        | 10.7                        |
| 20 | 0.63                        | 0.08                          | 0.23                | 2.15                        | 18.8                        | 1.32                        | 0.63                        | -0.02                         | -                   | 874                         | 42.1                        | 12.0                        |
| 21 | 1.09                        | 0.34                          | 0.09                | 9.49                        | 22.8                        | 2.39                        | -                           | -0.33                         | 0.18                | -                           | -                           | -                           |
| 22 | 0.93                        | -1.07                         | 0.17                | 1.60                        | 22.0                        | 1.49                        | 0.65                        | 1.44                          | 0.06                | 894                         | 47.2                        | 12.0                        |

|    |      |       |      |      |      |      |      |       |      |      |      |      |
|----|------|-------|------|------|------|------|------|-------|------|------|------|------|
| 23 | 1.04 | -1.22 | 0.13 | 4.13 | 24.8 | 2.68 | 0.25 | 0.87  | 0.01 | 329  | 15.5 | 3.85 |
| 24 | 1.26 | -1.20 | 0.19 | 5.32 | 19.1 | 0.82 | 0.60 | -0.82 | -    | 1014 | 51.8 | 9.03 |
| 25 | 0.77 | -0.38 | 0.03 | 1.45 | 22.1 | 0.76 | 0.68 | 0.50  | 0.06 | 753  | 46.6 | 11.4 |
| 26 | 0.81 | -1.04 | 0.03 | 2.16 | 20.1 | 1.06 | 0.66 | 0.31  | -    | 812  | 46.6 | 9.54 |
| 27 | 0.91 | -0.62 | -    | 1.69 | 24.2 | 1.85 | 0.64 | 0.53  | -    | 867  | 51.4 | 12.2 |
| 28 | 0.80 | -0.65 | -    | 1.28 | 21.9 | 0.78 | 0.54 | 0.55  | -    | 671  | 51.8 | 11.1 |
| 29 | 1.58 | 0.77  | 0.14 | 5.13 | 19.6 | 0.96 | 0.68 | 0.59  | -    | 695  | 38.0 | 10.2 |
| 30 | 0.92 | -0.40 | 0.01 | 10.1 | 23.3 | 1.00 | 0.60 | 0.25  | -    | 788  | 42.5 | 9.05 |
| 31 | 0.80 | -1.13 | 0.12 | 4.68 | 18.8 | 0.70 | 1.06 | 0.05  | 0.02 | 814  | 52.3 | 11.4 |
| 32 | 1.01 | -0.38 | 0.15 | 1.87 | 24.1 | 0.99 | 0.66 | 0.63  | 0.16 | 864  | 49.7 | 9.04 |
| 33 | 0.83 | -1.19 | 0.05 | 1.74 | 21.8 | 1.05 | 0.81 | 0.23  | 0.03 | 932  | 47.6 | 10.3 |
| 34 | 0.99 | -0.48 | 0.03 | 3.05 | 22.9 | 2.24 | 0.87 | 0.41  | 0.09 | 984  | 51.0 | 14.5 |
| 35 | 1.48 | -0.68 | 0.08 | 5.45 | 22.5 | 1.74 | 0.82 | 0.19  | -    | 785  | 50.4 | 11.7 |
| 36 | 1.06 | -0.18 | 0.09 | 5.11 | 22.5 | 3.31 | 1.00 | 0.76  | 0.14 | 1016 | 44.4 | 10.9 |
| 37 | 0.87 | -0.08 | 0.12 | 5.87 | 23.8 | 2.38 | 0.75 | 0.51  | 0.16 | 914  | 50.9 | 12.5 |
| 38 | 1.09 | -0.33 | 0.01 | 2.19 | 22.9 | 1.73 | 0.75 | 0.69  | 0.13 | 901  | 45.6 | 11.1 |
| 39 | 0.99 | -0.78 | 0.14 | 18.6 | 26.0 | 1.57 | 0.74 | -0.13 | 0.03 | 634  | 42.5 | 11.2 |
| 40 | 1.52 | -0.82 | 0.04 | 2.11 | 19.8 | 1.14 | 0.83 | 0.36  | 0.01 | 929  | 56.6 | 13.8 |
| 41 | 0.81 | -0.36 | 0.01 | 2.57 | 23.5 | 1.68 | 0.78 | 0.67  | 0.01 | 946  | 57.6 | 10.6 |

**Table S3. Elemental concentrations and  $\delta^{65}\text{Cu}$  values in plasma and RBC for benign patients.**

| ID | Plasma                      |                               |                     |                             |                             |                             | RBC                         |                               |                     |                             |                             |                             |
|----|-----------------------------|-------------------------------|---------------------|-----------------------------|-----------------------------|-----------------------------|-----------------------------|-------------------------------|---------------------|-----------------------------|-----------------------------|-----------------------------|
|    | [Cu]<br>( $\mu\text{g/g}$ ) | $\delta^{65}\text{Cu}$<br>(‰) | SD<br>( $n = 1-2$ ) | [Fe]<br>( $\mu\text{g/g}$ ) | [Mg]<br>( $\mu\text{g/g}$ ) | [Zn]<br>( $\mu\text{g/g}$ ) | [Cu]<br>( $\mu\text{g/g}$ ) | $\delta^{65}\text{Cu}$<br>(‰) | SD<br>( $n = 1-2$ ) | [Fe]<br>( $\mu\text{g/g}$ ) | [Mg]<br>( $\mu\text{g/g}$ ) | [Zn]<br>( $\mu\text{g/g}$ ) |
| 1  | 1.44                        | -0.64                         | 0.14                | 4.41                        | 29.5                        | 2.70                        | 0.90                        | -0.62                         | 0.05                | 722                         | 46.1                        | 14.6                        |
| 2  | 2.19                        | -0.40                         | 0.04                | 3.00                        | 25.2                        | 2.31                        | 1.18                        | 0.31                          | 0.08                | 706                         | 48.4                        | 13.6                        |
| 3  | 2.84                        | -0.15                         | 0.09                | 4.70                        | 28.1                        | 2.05                        | 1.90                        | 0.33                          | 0.00                | 591                         | 50.0                        | 12.9                        |
| 4  | 1.56                        | 0.39                          | 0.07                | 3.45                        | 28.0                        | 3.98                        | 0.95                        | 1.07                          | 0.02                | 696                         | 51.3                        | 14.2                        |
| 5  | 2.17                        | -0.25                         | 0.00                | 2.61                        | 23.7                        | 1.74                        | 1.43                        | 0.23                          | 0.07                | 501                         | 38.9                        | 12.5                        |
| 6  | 1.00                        | 0.34                          | 0.06                | 4.30                        | 25.0                        | 1.86                        | 0.76                        | 0.96                          | 0.09                | 558                         | 36.4                        | 9.32                        |
| 7  | 1.49                        | -0.15                         | 0.16                | 9.49                        | 25.2                        | 2.77                        | 1.19                        | 0.38                          | 0.03                | 737                         | 53.2                        | 12.6                        |
| 8  | 1.43                        | 0.25                          | 0.02                | 9.08                        | 23.3                        | 2.84                        | 1.08                        | 1.18                          | 0.17                | 701                         | 47.5                        | 12.3                        |
| 9  | 1.82                        | -0.48                         | 0.24                | 3.94                        | 30.4                        | 1.17                        | 0.84                        | 0.77                          | 0.04                | 964                         | 57.2                        | 14.7                        |
| 10 | 1.12                        | 0.12                          | 0.04                | 3.38                        | 24.2                        | 2.64                        | 0.75                        | 1.18                          | 0.01                | 880                         | 55.9                        | 12.8                        |
| 11 | 1.56                        | -0.14                         | 0.01                | 3.42                        | 24.3                        | 2.53                        | 0.47                        | 1.26                          | 0.05                | 676                         | 38.1                        | 10.3                        |
| 12 | 0.77                        | 0.44                          | 0.11                | 2.13                        | 25.8                        | 2.74                        | 0.67                        | 1.68                          | 0.02                | 770                         | 48.5                        | 8.59                        |
| 13 | 1.23                        | 0.22                          | 0.12                | 3.82                        | 23.3                        | 1.18                        | 0.51                        | 2.22                          | 0.25                | 753                         | 42.9                        | 9.57                        |
| 14 | 0.64                        | -0.10                         | -                   | 4.21                        | 18.8                        | 2.37                        | 0.70                        | 0.93                          | 0.17                | -                           | 18.7                        | 2.32                        |
| 15 | 0.94                        | -0.11                         | -                   | 13.5                        | 23.7                        | 1.43                        | 0.79                        | 0.39                          | 0.09                | 334                         | 30.6                        | 4.93                        |
| 16 | 0.92                        | -0.28                         | -                   | 2.58                        | 21.9                        | 1.25                        | 0.72                        | 0.76                          | -                   | 1007                        | 52.1                        | 11.6                        |
| 17 | 0.89                        | -0.14                         | -                   | 2.01                        | 21.1                        | 1.07                        | 0.59                        | -0.17                         | 0.07                | 820                         | 58.9                        | 9.62                        |

**Table S4. Elemental concentrations and  $\delta^{65}\text{Cu}$  values in plasma and RBC for age-matched healthy subjects.**

| ID | Plasma                      |                                          |                   |                             |                             |                             | RBC                         |                                          |                   |                             |                             |                             |
|----|-----------------------------|------------------------------------------|-------------------|-----------------------------|-----------------------------|-----------------------------|-----------------------------|------------------------------------------|-------------------|-----------------------------|-----------------------------|-----------------------------|
|    | [Cu]<br>( $\mu\text{g/g}$ ) | $\delta^{65}\text{Cu}$<br>( $\text{‰}$ ) | SD<br>( $n = 3$ ) | [Fe]<br>( $\mu\text{g/g}$ ) | [Mg]<br>( $\mu\text{g/g}$ ) | [Zn]<br>( $\mu\text{g/g}$ ) | [Cu]<br>( $\mu\text{g/g}$ ) | $\delta^{65}\text{Cu}$<br>( $\text{‰}$ ) | SD<br>( $n = 3$ ) | [Fe]<br>( $\mu\text{g/g}$ ) | [Mg]<br>( $\mu\text{g/g}$ ) | [Zn]<br>( $\mu\text{g/g}$ ) |
| 1  | 1.85                        | 0.20                                     | 0.06              | 2.52                        | 28.8                        | 2.17                        | 0.64                        | 1.16                                     | 0.02              | 795                         | 56.3                        | 10.8                        |
| 2  | 1.85                        | 0.16                                     | 0.03              | 2.01                        | 22.3                        | 1.98                        | 0.69                        | 1.59                                     | 0.03              | 964                         | 54.6                        | 11.6                        |
| 3  | 1.30                        | 0.43                                     | 0.02              | 2.93                        | 22.1                        | 1.58                        | 0.58                        | 1.45                                     | 0.04              | 890                         | 44.6                        | 9.29                        |
| 4  | 1.16                        | 0.02                                     | 0.03              | 1.30                        | 18.9                        | 1.13                        | 0.73                        | 1.41                                     | 0.02              | 1002                        | 61.7                        | 11.4                        |
| 5  | 1.63                        | 0.29                                     | 0.09              | 2.45                        | 23.2                        | 1.74                        | 0.71                        | 1.68                                     | 0.03              | 1002                        | 58.4                        | 11.1                        |
| 6  | 1.25                        | -0.16                                    | 0.05              | 2.25                        | 22.5                        | 1.34                        | 0.59                        | 1.20                                     | 0.03              | 906                         | 49.6                        | 12.8                        |
| 7  | 1.31                        | -0.10                                    | 0.03              | 2.91                        | 23.0                        | 1.55                        | 0.74                        | 1.86                                     | 0.03              | 941                         | 61.4                        | 10.3                        |
| 8  | 1.00                        | 0.29                                     | 0.07              | 6.78                        | 22.6                        | 1.52                        | 0.59                        | 1.89                                     | 0.02              | 977                         | 44.3                        | 11.3                        |
| 9  | 1.33                        | -0.12                                    | 0.02              | 1.69                        | 19.4                        | 1.52                        | 0.73                        | 1.16                                     | 0.02              | 948                         | 51.3                        | 11.5                        |
| 10 | 0.91                        | 0.24                                     | 0.04              | 1.63                        | 19.7                        | 1.41                        | 0.63                        | 1.34                                     | 0.03              | 929                         | 49.7                        | 10.8                        |
| 11 | 1.10                        | 0.17                                     | 0.04              | 1.96                        | 23.4                        | 1.63                        | 0.63                        | 1.22                                     | 0.03              | 977                         | 58.9                        | 13.3                        |
| 12 | 1.28                        | 0.02                                     | 0.01              | 2.07                        | 26.1                        | 1.42                        | 0.68                        | 1.31                                     | 0.02              | 941                         | 47.5                        | 10.6                        |
| 13 | 1.39                        | 0.08                                     | 0.05              | 2.57                        | 22.6                        | 1.58                        | 0.64                        | 1.76                                     | 0.01              | 930                         | 47.5                        | 10.3                        |
| 14 | 1.74                        | -0.05                                    | 0.01              | 4.75                        | 24.9                        | 2.94                        | 0.64                        | 1.35                                     | 0.05              | 990                         | 65.8                        | 12.6                        |
| 15 | 1.41                        | 0.23                                     | 0.05              | 2.86                        | 28.1                        | 2.72                        | 0.63                        | 1.26                                     | 0.07              | 1021                        | 56.3                        | 12.5                        |
| 16 | 1.18                        | 0.38                                     | 0.02              | 1.62                        | 22.6                        | 1.45                        | 0.79                        | 1.46                                     | 0.00              | 1001                        | 56.7                        | 10.7                        |
| 17 | 1.35                        | -0.42                                    | 0.10              | 2.12                        | 21.9                        | 1.94                        | 0.79                        | 2.18                                     | 0.03              | 1014                        | 55.7                        | 14.0                        |
| 18 | 1.26                        | 0.00                                     | 0.06              | 2.93                        | 23.9                        | 1.59                        | 0.67                        | 1.11                                     | 0.06              | 958                         | 58.4                        | 13.0                        |
| 19 | 1.89                        | 0.46                                     | 0.04              | 2.06                        | 26.0                        | 3.02                        | 0.69                        | 1.54                                     | 0.02              | 964                         | 56.3                        | 11.0                        |
| 20 | 1.26                        | 0.32                                     | 0.09              | 2.12                        | 25.4                        | 1.53                        | 0.61                        | 1.37                                     | 0.04              | 7667                        | 44.8                        | 10.2                        |
| 21 | 1.40                        | 0.05                                     | 0.04              | 3.28                        | 22.8                        | 2.01                        | 0.57                        | 1.41                                     | 0.05              | 954                         | 49.7                        | 9.45                        |
| 22 | 1.26                        | 0.06                                     | 0.01              | 1.30                        | 26.2                        | 1.46                        | 0.57                        | 1.20                                     | 0.02              | 953                         | 56.5                        | 11.8                        |

|    |      |       |      |      |      |      |      |      |      |      |      |      |
|----|------|-------|------|------|------|------|------|------|------|------|------|------|
| 23 | 5.01 | 0.16  | 0.02 | 1.64 | 25.5 | 4.19 | 0.65 | 1.17 | 0.04 | 1015 | 58.4 | 13.8 |
| 24 | 1.09 | -0.09 | 0.08 | 2.53 | 20.0 | 1.48 | 0.67 | 0.79 | 0.04 | 926  | 41.5 | 12.1 |
| 25 | 1.06 | -0.28 | 0.04 | 2.15 | 19.4 | 1.39 | 0.65 | 1.04 | 0.01 | 1028 | 56.0 | 12.5 |
| 26 | 2.03 | -0.38 | 0.01 | 2.33 | 23.2 | 2.26 | 3.64 | 2.36 | 0.19 | 999  | 55.8 | 14.7 |
| 27 | 1.22 | 0.00  | 0.03 | 2.20 | 23.6 | 1.78 | 0.70 | 1.45 | 0.05 | 998  | 54.5 | 9.35 |
| 28 | 1.78 | 0.11  | 0.06 | 2.29 | 21.9 | 1.33 | 0.66 | 0.74 | 0.02 | 932  | 52.0 | 10.7 |
| 29 | 1.21 | -0.26 | 0.02 | 2.08 | 27.4 | 1.44 | 0.64 | 0.59 | 0.02 | 937  | 50.3 | 11.3 |
| 30 | 1.35 | 0.16  | 0.04 | 2.22 | 21.3 | 1.77 | 0.64 | 1.51 | 0.03 | 939  | 54.1 | 11.1 |

**Table S5. Information and elemental concentrations in plasma and RBC for young healthy subjects.**

| ID | Age | Gender | Plasma         |                |                |                | RBC            |                |                |                |
|----|-----|--------|----------------|----------------|----------------|----------------|----------------|----------------|----------------|----------------|
|    |     |        | [Cu]<br>(µg/g) | [Fe]<br>(µg/g) | [Mg]<br>(µg/g) | [Zn]<br>(µg/g) | [Cu]<br>(µg/g) | [Fe]<br>(µg/g) | [Mg]<br>(µg/g) | [Zn]<br>(µg/g) |
| 1  | 33  | Male   | 0.27           | 5.06           | 24.1           | 0.10           | 0.28           | 803            | 47.1           | 11.5           |
| 2  | 21  | Female | 0.39           | 6.49           | 25.7           | 0.19           | 0.19           | 703            | 45.0           | 8.42           |
| 3  | 20  | Female | 0.18           | 7.17           | 25.7           | 0.11           | 0.10           | 742            | 45.5           | 7.34           |
| 4  | 19  | Female | 0.29           | 7.35           | 30.8           | 0.21           | 0.14           | 701            | 49.4           | 8.88           |
| 5  | 16  | Female | 0.47           | 7.22           | 30.8           | 0.25           | 0.28           | 785            | 44.3           | 8.84           |
| 6  | 20  | Male   | 0.60           | 10.6           | 29.4           | 0.12           | 0.26           | 809            | 41.5           | 8.44           |
| 7  | 14  | Female | 0.37           | 8.08           | 25.9           | 0.26           | 0.29           | 735            | 43.4           | 9.00           |
| 8  | 17  | Female | 0.34           | 12.6           | 25.6           | 0.54           | 0.40           | 770            | 42.3           | 9.14           |
| 9  | 19  | Male   | 0.48           | 5.05           | 22.8           | 0.60           | 0.23           | 676            | 37.4           | 8.47           |
| 10 | 20  | Female | 0.15           | 6.92           | 25.3           | 0.18           | 0.17           | 635            | 32.9           | 6.42           |
| 11 | 19  | Male   | 0.08           | 8.33           | 29.0           | 0.33           | 0.19           | 854            | 40.5           | 11.0           |
| 12 | 22  | Female | 0.77           | 9.68           | 29.4           | 0.39           | 0.19           | 790            | 39.7           | 7.95           |
| 13 | 23  | Male   | 0.33           | 7.00           | 31.3           | 0.30           | 0.09           | 687            | 43.0           | 8.59           |
| 14 | 23  | Female | 0.18           | 6.13           | 27.3           | 0.29           | 0.44           | 796            | 47.8           | 10.5           |
| 15 | 23  | Male   | 0.13           | 5.26           | 29.4           | 0.33           | 0.17           | 748            | 39.6           | 11.3           |
| 16 | 29  | Male   | 0.19           | 4.05           | 32.6           | 0.09           | 0.16           | 888            | 43.4           | 11.5           |
| 17 | 25  | Male   | 0.87           | 10.6           | 32.0           | 0.68           | 0.13           | 809            | 43.9           | 9.45           |
| 18 | 21  | Male   | 0.36           | 5.25           | 29.7           | 0.06           | 0.47           | 742            | 42.1           | 11.3           |

**Table S6. Information and blood biochemical indexes for BCa patients.**

| ID | Age | Gender | BMI  | ABO | Grade of malignancy | IHC <sup>a</sup>                 | Hematuria | ALT  | AST  | NLR       | Cre  | BUN | LY (%) | RBC  | WBC  |
|----|-----|--------|------|-----|---------------------|----------------------------------|-----------|------|------|-----------|------|-----|--------|------|------|
| 1  | 80  | Male   | 26.2 | O   | -                   | TFE3+, P504s, Vimentin+, CD10+   | yes       | 29.2 | 20.2 | 62.6/28   | 99.2 | 6.1 | 28     | 5.47 | 5.5  |
| 2  | 63  | Male   | 24.8 | -   | -                   | p53++, p21+++                    | yes       | 12.8 | 10   | 71.3/20.4 | 114  | 7.3 | 20.4   | 4.03 | 10.6 |
| 3  | 58  | Male   | 25.4 | O   | high                | CgA+, CK20+, SYN+, CK7+          | yes       | 21.2 | 17.5 | 91.7/3.3  | 103  | 4.4 | 25.7   | 4.48 | 5.6  |
| 4  | 58  | Male   | 24.2 | B   | high                | p53+++, p21++                    | not       | 16.2 | 18.6 | 83.7/10.2 | 67.3 | 4.1 | 10.2   | 4.46 | 12.8 |
| 5  | 60  | Male   | 21.5 | AB  | high                | Ki-67++, p53++, p21+, p63+, CK7+ | yes       | 23.7 | 17   | 66.3/25   | 55.6 | 2.5 | 25     | 5.51 | 8.2  |
| 6  | 52  | Male   | 23.5 | O   | high                | p53+++, p21+++                   | yes       | 24.4 | 17.7 | 45.1/38.9 | 85.8 | 6.8 | 38.9   | 5.23 | 6.8  |
| 7  | 67  | Female | 28.0 | AB  | -                   | -                                | yes       | 21.1 | 15.7 | 54.8/36   | 87.6 | 8.4 | 36     | 3.33 | 7.2  |
| 8  | 60  | Male   | 24.0 | -   | high                | Ki67++, p53++, p21++             | yes       | 20.9 | 17.6 | 74.8/16.8 | 76.4 | 6.2 | 31.2   | 5.16 | 5.4  |
| 9  | 63  | Male   | 21.1 | -   | high                | p53+++, p21++                    | yes       | 5.9  | 11.5 | 86.6/9.5  | 51.6 | 2.5 | 9.5    | 3.2  | 9.7  |
| 10 | 54  | Male   | 28.7 | O   | low                 | Ki67+, p53+, p21+                | yes       | 19.8 | 13.2 | 48.4/41.3 | 80.5 | 3.5 | 41.3   | 4.82 | 6.1  |
| 11 | 59  | Male   | 24.3 | AB  | high                | Ki67+++, p53+, p21+              | yes       | 32.5 | 29.8 | 77.1/45.4 | 66.9 | 4.4 | 45.4   | 6.2  | 7.2  |
| 12 | 68  | Male   | 25.3 | B   | high                | CK20+, Ki67++, Syn+, NSE+, CD56+ | yes       | 48   | 36   | 55.4/34.7 | 90.4 | 4   | 34.7   | 5.11 | 5.2  |
| 13 | 67  | Female | 27.2 | A   | low                 | p53+, Ki67<1%TCP                 | yes       | 15   | 17   | 92.4/41.4 | 67.9 | 5.9 | 41.4   | 4.04 | 7.4  |
| 14 | 53  | Male   | 23.5 | A   | low                 | p53++, Ki67≈15% TCP              | yes       | 15.3 | 24.2 | 48.8/18.8 | 80.2 | 2.5 | 18.8   | 7.8  | 6.1  |
| 15 | 80  | Male   | 21.0 | O   | low                 | p53++, p21++, Ki67≈10%TCP        | yes       | 8.6  | 15   | 72.4/32.1 | 85.2 | 3.6 | 32.1   | 4.6  | 9.9  |

|    |    |        |      |    |      |                                         |     |      |      |           |      |      |      |      |      |
|----|----|--------|------|----|------|-----------------------------------------|-----|------|------|-----------|------|------|------|------|------|
| 16 | 71 | Male   | 19.1 | B  | high | -                                       | yes | 5.2  | 11.1 | 89.3/15.1 | 78.3 | 4.5  | 15.1 | 3.4  | 7.7  |
| 17 | 61 | Male   | 23.4 | O  | high | CK27+, CgA±,<br>p53+++                  | yes | 15.7 | 14.1 | 56.4/12   | 91.2 | 7.9  | 12   | 6.8  | 3.7  |
| 18 | 59 | Female | 28.4 | A  | low  | p21++, p53++<br>Ki67<5% TCP             | yes | 16.6 | 17.4 | 87.6/14.1 | 99.5 | 6.2  | 14.1 | 2.5  | 15.1 |
| 19 | 55 | Female | 63.9 | AB | low  | p53+, p21+,<br>Ki67≈10% TCP             | yes | 27.9 | 22.9 | 48.3/7.4  | 66.2 | 3.5  | 7.4  | 3.2  | 9.3  |
| 20 | 78 | Male   | 23.1 | A  | high | p53++, p21++<br>Ki67≈10% TCP            | yes | 7.9  | 18   | 55.1/22   | 102  | 3.8  | 22   | 4.37 | 7.2  |
| 21 | 62 | Male   | 31.4 | O  | high | Ki67++, p53+, p21+                      | yes | 32.1 | 38.1 | 87.1/41   | 87.4 | 2.6  | 41   | 5.92 | 5    |
| 22 | 73 | Female | 32.0 | B  | low  | p53++, p21+,<br>Ki67<10% TCP            | yes | 33.6 | 28.1 | 78.2/23   | 71.2 | 3.5  | 23   | 4.32 | 6.8  |
| 23 | 82 | Male   | 25.1 | B  | high | p53+, p21+++,<br>Ki67≈90% TCP           | yes | 33.6 | 26.5 | 63.1/26.7 | 67.7 | 4    | 26.7 | 5.15 | 6.6  |
| 24 | 75 | Female | 24.2 | O  | high | CK7+, CK20+,<br>p53+, Ki67 index7%      | yes | 28.2 | 61.6 | 52.2/25   | 113  | 10.6 | 25   | 4.22 | 4.9  |
| 25 | 57 | Male   | 27.1 | B  | low  | p53++, p21+,<br>Ki67<5% TCP             | yes | 30.6 | 15.9 | 52.4/33.5 | 64   | 2.6  | 33.5 | 4.6  | 10.3 |
| 26 | 62 | Male   | 28.4 | AB | low  | p53++, p21+++,<br>Ki67+++               | yes | 34   | 15   | 69.6/26.4 | 91   | 7    | 26.4 | 4.82 | 10   |
| 27 | 66 | Female | 21.4 | -  | low  | p53+, p21++, Ki67+<br>CK7 Positive, Syn | yes | 8.5  | 26.3 | 52.2/37.4 | 59.4 | 4.4  | 37.4 | 4.1  | 4.4  |
| 28 | 77 | Male   | 24.6 | B  | high | Positive, NSE<br>Positive               | yes | 14.5 | 14.3 | 62.2/26.2 | 88.9 | 6.7  | 26.2 | 4.53 | 5.8  |
| 29 | 63 | Female | 22.8 | AB | low  | p53+, p21++, Ki67<br>individual cells+  | yes | 15   | 21   | 66.3/24.3 | 65   | 7    | 24.3 | 4.28 | 14.7 |



|    |    |        |      |    |      |                                 |     |      |      |           |      |     |      |      |      |
|----|----|--------|------|----|------|---------------------------------|-----|------|------|-----------|------|-----|------|------|------|
| 30 | 55 | Female | 29.3 | -  | high | p53+++, p21+,<br>Ki67+++        | yes | 48.5 | 24.3 | 54.2/40.3 | 50.3 | 4   | 40.3 | 4.83 | 5.6  |
| 31 | 62 | Female | 30.4 | -  | low  | p53+++, p21+++,<br>Ki67<5%TCP   | yes | 32   | 15.7 | 43.3/46.5 | 71.8 | 3.9 | 46.5 | 4.49 | 6.4  |
| 32 | 77 | Male   | 27.3 | B  | low  | p53+, p21+, Ki67+               | yes | 28   | 18   | 70.1/24   | 74.6 | 4.5 | 5.3  | 5.13 | 10.9 |
| 33 | -  | Female | 27.0 | -  | -    | -                               | -   | 23.8 | 30.9 | 30.7/60.4 | 24.5 | 2.2 | 60.4 | 3.91 | 6.7  |
| 34 | 71 | Male   | 29.4 | B  | high | p53+++, p21++,<br>Ki67≈30%TCP   | yes | 26.8 | 20.8 | 55.4/34.7 | 67.9 | 6.3 | 36   | 4.53 | 7.5  |
| 35 | 61 | Male   | 25.7 | AB | high | p53+, Ki67<br>individual cells+ | yes | 9    | 15   | 68.4/21.3 | 111  | 8   | 32.3 | 5.3  | 8.4  |
| 36 | 67 | Male   | 31.1 | -  | high | p53+++, p21++,<br>Ki67≈30%TCP   | yes | 9.8  | 18.2 | 61.6/31.1 | 75.9 | 4.2 | 31.1 | 5.5  | 7.4  |
| 37 | 71 | Male   | 27.0 | O  | low  | p53++, p21++,<br>Ki67≈5%TCP     | yes | 24.5 | 29.8 | 61.9/29.4 | 69.2 | 4.4 | 29.4 | 4.86 | 7.5  |
| 38 | 84 | Female | 21.0 | O  | low  | p53+, p21+, Ki67++              | yes | 16.9 | 17.9 | 44.7/44.8 | 51.6 | 7.6 | 44.8 | 3.84 | 5    |
| 39 | 71 | Male   | 20.6 | A  | high | CK7+, CK20+                     | yes | 10.9 | 28.9 | 71.1/18.2 | 122  | 8   | 18.2 | 4.43 | 8.2  |
| 40 | 72 | Female | 30.0 | O  | high | CK7+, CK20+                     | yes | 20   | 21   | 83.1/10.1 | 91.1 | 7   | 42.4 | 3.89 | 3.5  |
| 41 | 57 | Male   | 22.3 | AB | low  | p53++, p21++,<br>Ki67+          | yes | 13.9 | 36.4 | 60.8/30.3 | 80.7 | 3.8 | 30.3 | 4.34 | 4.8  |

<sup>a</sup> TCP in IHC means tumor cell positive.

**Table S7. Information and blood biochemical indexes for benign patients.**

| ID | Age | Gender | BMI  | ABO | IHC                  | Hematuria | ALT  | AST  | NLR        | Cre  | BUN  | LY (%) | RBC  | WBC  |
|----|-----|--------|------|-----|----------------------|-----------|------|------|------------|------|------|--------|------|------|
| 1  | 71  | Male   | 26.3 | B   | -                    | no        | 14.3 | 18.8 | 62.5/27.8  | 73.9 | 4.5  | 27.8   | 4.80 | 5.9  |
| 2  | 79  | Female | 29.1 | AB  | -                    | no        | 7.40 | 19.5 | 75.4/13.8  | 245  | 15.9 | 13.8   | 4.01 | 12.9 |
| 3  | 61  | Female | 25.5 | -   | -                    | -         | 56.5 | 33.5 | 79.8/14    | 85.3 | 4.0  | 14     | 4.33 | 5.7  |
| 4  | 57  | Female | 28.6 | A   | -                    | no        | 26.9 | 29.0 | 71.8/22.3  | 63.0 | 5.5  | 22.3   | 4.26 | 7.3  |
| 5  | 75  | Female | 28.5 | O   | -                    | no        | 13.4 | 14.2 | 76.3/17.8  | 52.7 | 5.4  | 17.8   | 4.55 | 8.1  |
| 6  | 49  | Male   | 26.4 | B   | -                    | no        | 33.6 | 24.4 | 53.5/38.9  | 72.2 | 4.3  | 38.9   | 4.48 | 5    |
| 7  | 68  | Male   | 29.4 | A   | -                    | no        | 11.9 | 14.2 | 74.2/18.9  | 76.7 | 8.7  | 18.9   | 5.00 | 7.6  |
| 8  | 44  | Female | 22.8 | O   | -                    | no        | 16.8 | 18.9 | 53.6/40.6  | 57.6 | 2.1  | 40.6   | 4.47 | 6.9  |
| 9  | 66  | Male   | 19.7 | O   | -                    | no        | 26.8 | 17.7 | 70.9/22.6  | 90.1 | 6.9  | 22.6   | 5.20 | 7.6  |
| 10 | 47  | Female | 25.4 | -   | -                    | no        | 31.3 | 24.8 | 83/11.8    | 50.3 | 4.2  | 11.6   | 4.04 | 11.5 |
| 11 | 71  | Male   | 16.4 | B   | -                    | no        | 8.90 | 16.2 | 50.9/41.9  | 108  | 5.6  | 41.9   | 4.58 | 5    |
| 12 | 76  | Male   | 23.5 | -   | -                    | no        | 13.8 | 15.1 | 87.5/6.1   | 74.5 | 3.5  | 6.1    | 5.16 | 11   |
| 13 | 33  | Male   | 30.4 | B   | -                    | no        | 18.3 | 14.7 | 62.7/30.4  | 73.9 | 6.2  | 30.4   | 5.50 | 9.4  |
| 14 | 38  | Male   | 22.2 | O   | CK20+, CK7+,<br>p63+ | no        | 13.9 | 12.3 | 91.3/15    | 67.2 | 3.3  | 15     | 3.70 | 7.9  |
| 15 | 56  | Male   | 26.9 | B   |                      | no        | 14.4 | 9.90 | 73.1/18.69 | 62.2 | 5.9  | 18.69  | 3.72 | 4.1  |
| 16 | 67  | Male   | 29.4 | B   |                      | no        | 90.7 | 32.1 | 62.2/27    | 65.2 | 5.2  | 27     | 5.07 | 10.4 |
| 17 | 47  | Male   | 21.2 | AB  | -                    | no        | 32.6 | 24.3 | 62.7/22.1  | 75.0 | 5.9  | 22.1   | 4.87 | 5.9  |

**Table S8. Information and blood biochemical indexes for age-matched healthy subjects.**

| ID | Age | Gender | BMI  | ALT  | AST  | NLR       | Cre  | BUN  | WBC  |
|----|-----|--------|------|------|------|-----------|------|------|------|
| 1  | 57  | Female | 25.2 | 14.6 | 18.2 | 59/31.2   | 61.4 | 8.47 | 6.08 |
| 2  | 58  | Male   | 27.3 | 25.7 | 19.3 | 53.5/33.2 | 85.0 | 7.60 | 8.27 |
| 3  | 59  | Male   | 29.1 | 80.7 | 49.3 | 53.3/39.0 | 85.2 | 4.72 | 8.96 |
| 4  | 56  | Female | 24.1 | 22.3 | 23.7 | 55.2/35.3 | 51.9 | 5.35 | 5.11 |
| 5  | 46  | Male   | 31.0 | 54.4 | 35.7 | 52.7/37.5 | 65.8 | 4.73 | 6.91 |
| 6  | 90  | Male   | 21.2 | 10.1 | 14.0 | 48.1/39.2 | 83.3 | 8.30 | 5.79 |
| 7  | 56  | Male   | 36.8 | 22.4 | 17.5 | 57.4/36.3 | 89.1 | 6.30 | 8.97 |
| 8  | 54  | Male   | 20.2 | 12.4 | 19.5 | 58.6/32.1 | 59.0 | 5.98 | 4.78 |
| 9  | 59  | Female | 27.4 | 14.6 | 14.4 | 54.2/38.6 | 67.6 | 7.54 | 5.96 |
| 10 | 56  | Female | 23.4 | 13.1 | 16.3 | 53.4/36.8 | 42.1 | 5.16 | 6.56 |
| 11 | 56  | Female | 31.3 | 30.0 | 19.5 | 62.1/30.9 | 60.0 | 5.74 | 9.09 |
| 12 | 59  | Female | 28.3 | 13.9 | 17.2 | 54.5/38.4 | 59.0 | 6.02 | 5.71 |
| 13 | 59  | Male   | 26.9 | 14.0 | 18.2 | 55.3/32.4 | 73.8 | 5.15 | 5.03 |
| 14 | 56  | Female | 28.7 | 28.7 | 21.5 | 61.4/29.3 | 44.6 | 4.44 | 6.21 |
| 15 | 57  | Male   | 27.8 | 39.5 | 18.3 | 62.5/29.1 | 75.1 | 3.96 | 6.30 |
| 16 | 59  | Male   | 27.7 | 20.6 | 19.9 | 45.2/47.7 | 93.2 | 6.30 | 7.59 |
| 17 | 55  | Female | 23.3 | 14.8 | 17.2 | 56.9/35.6 | 47.8 | 4.08 | 5.27 |
| 18 | 58  | Female | 27.0 | 4.63 | 15.9 | 65.1/26.8 | 54.0 | 5.51 | 6.99 |
| 19 | 56  | Male   | 23.5 | 16.8 | 13.8 | 61.0/31.1 | 67.3 | 6.53 | 6.09 |
| 20 | 56  | Male   | 27.4 | 16.1 | 17.3 | 45.6/46.8 | 66.1 | 7.66 | 5.27 |
| 21 | 59  | Male   | 29.1 | 20.4 | 15.8 | 63.3/29.5 | 59.1 | 4.63 | 9.49 |
| 22 | 57  | Female | 25.1 | 9.47 | 11.5 | 79.1/16.2 | 51.8 | 5.33 | 9.58 |
| 23 | 59  | Female | 21.0 | 13.2 | 18.6 | 41.8/48.9 | 58.8 | 6.00 | 4.49 |
| 24 | 58  | Female | 29.0 | 13.8 | 16.4 | 67.1/26.7 | 47.7 | 4.54 | 7.44 |

|    |    |        |      |      |      |           |      |      |      |
|----|----|--------|------|------|------|-----------|------|------|------|
| 25 | 56 | Female | 25.2 | 20.6 | 14.2 | 58.8/33.6 | 44.4 | 3.93 | 6.54 |
| 26 | 55 | Male   | 24.8 | 35.6 | 20.8 | 54.0/38.9 | 66.0 | 6.59 | 7.49 |
| 27 | 54 | Male   | 23.5 | 12.2 | 23.3 | 36.9/53.7 | 65.0 | 3.97 | 4.85 |
| 28 | 52 | Female | 26.5 | 15.5 | 16.0 | 63.9/31.4 | 62.2 | 6.07 | 7.25 |
| 29 | 57 | Female | 28.6 | 30.3 | 20.8 | 52.2/38.8 | 63.0 | 3.33 | 7.28 |
| 30 | 56 | Male   | 24.2 | 12.8 | 15.7 | 49.4/42.9 | 90.7 | 8.96 | 8.11 |

---

**Table S9. Comparison of the performance of this method with established urinary biomarkers for BCa.<sup>a</sup>**

| Biomarker/test system           | Overall sensitivity (%) | Overall specificity (TNR) (%) | Sensitivity for high-grade BCa (%) |
|---------------------------------|-------------------------|-------------------------------|------------------------------------|
| UroVysion (FISH)*               | 30-86                   | 63-95                         | 66-70                              |
| Microsatellite analysis         | 58-92                   | 73-100                        | 90-92                              |
| Immunocyt/uCyt +*               | 52-100                  | 63-79                         | 62-92                              |
| NMP22*                          | 47-100                  | 55-98                         | 75-92                              |
| BTA stat*                       | 29-83                   | 56-86                         | 62-91                              |
| BTA TRAK*                       | 53-91                   | 28-83                         | 74-77                              |
| Cytokeratins                    | 12-88                   | 73-95                         | 33-100                             |
| 2D Cu signatures<br>(this work) | 87.8                    | 91.5                          | 94.7                               |

<sup>a</sup> The information is taken from the *EAU Guidelines on Non-muscle-invasive Bladder Cancer (TaT1 and CIS)*, European Association of Urology 2018.<sup>13</sup> The asterisk means FDA approved.

**Table S10. Parameters for Cu isotope ratio measurement by MC-ICP-MS.**

|                                           |                                                                                                                            |
|-------------------------------------------|----------------------------------------------------------------------------------------------------------------------------|
| Sample preparation                        |                                                                                                                            |
| Digestion                                 | 1 mL or 0.5 mL with 7.5 mL of 14 M HNO <sub>3</sub> and 1 mL of 30% H <sub>2</sub> O <sub>2</sub> in Teflon digestion tube |
| Column purification                       | Anion exchange resin (AG-MP-1M) 100-200 mesh                                                                               |
| Solution for elution of Cu                | 12 mL of 5 M HCl + 0.001% H <sub>2</sub> O <sub>2</sub> solution                                                           |
| Solution for elution of Fe                | 7 mL of 0.6 M HCl solution                                                                                                 |
| Solution for elution of Zn                | 8 mL of 0.7 M HNO <sub>3</sub> solution                                                                                    |
| Elimination of chloride ion               | Dryness at 100 °C and redissolution in 0.7M HNO <sub>3</sub>                                                               |
| Instrument settings                       |                                                                                                                            |
| Sample introduction                       | Peristaltic pump at 8 rpm uptake rate                                                                                      |
| Sampler cone (nickel)                     | “experimental” WA cone (Nu Instruments)                                                                                    |
| Skimmer cone (nickel)                     | “experimental” WA cone (Nu Instruments)                                                                                    |
| Lens settings                             | Optimized for maximum analytical signal intensity                                                                          |
| Torch                                     | Glass                                                                                                                      |
| Collector                                 | L2— <sup>63</sup> Cu , H2— <sup>65</sup> Cu                                                                                |
| RF power                                  | 1300 W                                                                                                                     |
| Data acquisition parameters               |                                                                                                                            |
| Scan type                                 | Static measurement                                                                                                         |
| Measurement mode                          | Low-resolution with standard-sample-standard bracketing                                                                    |
| Measurement intensity ( <sup>63</sup> Cu) | 10 V/ppm                                                                                                                   |
| Blank signal                              | 20 to 40 mV                                                                                                                |
| Magnet delay time                         | 2 s                                                                                                                        |
| Number of blocks                          | 1 block, 30 cycles                                                                                                         |

**Table S11. Cu concentrations and  $\delta^{65}\text{Cu}$  values in serum and RBC for HCC patients and controls reported in a previous paper.<sup>a</sup>**

| Group   | ID  | Serum                    |                            | RBC                      |                            |
|---------|-----|--------------------------|----------------------------|--------------------------|----------------------------|
|         |     | [Cu] ( $\mu\text{g/g}$ ) | $\delta^{65}\text{Cu}$ (‰) | [Cu] ( $\mu\text{g/g}$ ) | $\delta^{65}\text{Cu}$ (‰) |
| Non-HCC | 3   | 3.14                     | -0.06                      | 0.93                     | 0.66                       |
| Non-HCC | 12  | 2.44                     | 0.38                       | 1.02                     | 1.05                       |
| Non-HCC | 24  | 1.32                     | -0.20                      | 0.97                     | 0.58                       |
| Non-HCC | 25  | 3.07                     | -0.08                      | 1.22                     | 1.19                       |
| Non-HCC | 26  | 3.49                     | 0.22                       | 1.21                     | 0.67                       |
| Non-HCC | 41  | 1.58                     | -                          | 0.94                     | 0.79                       |
| Non-HCC | 42  | 1.39                     | 0.25                       | 0.97                     | 1.13                       |
| Non-HCC | 44  | 1.89                     | 0.33                       | 1.09                     | 0.88                       |
| Non-HCC | 45  | 1.66                     | -0.39                      | 0.93                     | 0.89                       |
| Non-HCC | 46  | 1.14                     | 0.17                       | 0.81                     | 0.79                       |
| Non-HCC | 47  | 1.24                     | 0.33                       | 0.93                     | 1.24                       |
| Non-HCC | 48  | 1.92                     | 0.13                       | 1.00                     | 1.22                       |
| Non-HCC | 49  | 2.63                     | 0.07                       | 0.98                     | 0.86                       |
| Non-HCC | 50  | 2.81                     | 0.04                       | 1.12                     | 0.64                       |
| Non-HCC | 51  | 2.86                     | 0.30                       | 1.10                     | 0.97                       |
| Non-HCC | 53  | 1.82                     | -0.21                      | 1.22                     | 0.62                       |
| Non-HCC | 60  | 2.54                     | -0.09                      | 0.92                     | 0.75                       |
| Non-HCC | 103 | 2.32                     | 0.37                       | 0.85                     | 1.03                       |
| Non-HCC | 111 | 1.21                     | 0.33                       | 1.11                     | 0.99                       |
| Non-HCC | 157 | 1.17                     | 0.07                       | 0.92                     | 0.57                       |
| HCC     | 1   | 3.40                     | -0.01                      | 1.04                     | 0.35                       |
| HCC     | 10  | 3.41                     | -0.07                      | 1.16                     | 0.65                       |
| HCC     | 11  | 4.91                     | -                          | 1.54                     | -0.07                      |
| HCC     | 16  | 4.96                     | 0.47                       | 1.61                     | 0.90                       |
| HCC     | 20  | 3.39                     | -0.66                      | 0.83                     | 0.03                       |
| HCC     | 62  | 3.42                     | 0.08                       | 1.10                     | 0.45                       |
| HCC     | 68  | 3.59                     | 0.19                       | 1.85                     | 0.56                       |
| HCC     | 69  | 5.16                     | -                          | 1.03                     | 0.26                       |
| HCC     | 77  | 5.61                     | 0.26                       | 1.22                     | 0.73                       |
| HCC     | 78  | 4.08                     | -0.30                      | 0.99                     | 0.25                       |
| HCC     | 86  | 3.42                     | -0.08                      | 0.96                     | 0.92                       |
| HCC     | 88  | 3.23                     | -0.19                      | 1.05                     | 0.62                       |
| HCC     | 90  | 3.68                     | -0.39                      | 1.06                     | 0.41                       |
| HCC     | 108 | 4.11                     | 0.07                       | 1.08                     | 0.47                       |
| HCC     | 118 | 3.84                     | 0.11                       | 1.48                     | 0.10                       |
| HCC     | 140 | 3.80                     | 0.15                       | 1.00                     | 0.82                       |
| HCC     | 144 | 4.78                     | 0.16                       | 1.44                     | 0.72                       |
| HCC     | 145 | 2.91                     | 0.05                       | 1.18                     | 0.63                       |
| HCC     | 154 | 3.95                     | 0.44                       | 0.96                     | 0.84                       |

|     |     |      |       |      |      |
|-----|-----|------|-------|------|------|
| HCC | 162 | 4.45 | -0.22 | 1.77 | 0.21 |
| HCC | 174 | 3.97 | -0.25 | 1.09 | 0.44 |
| HCC | 204 | 3.10 | 0.02  | 1.29 | 0.65 |
| HCC | 259 | 3.08 | -0.19 | 0.92 | 0.76 |

<sup>a</sup> The Cu concentrations and  $\delta^{65}\text{Cu}$  values for HCC patients and controls are from a previously published paper by Balter et al.<sup>14</sup>



## 4. Supplementary Figures

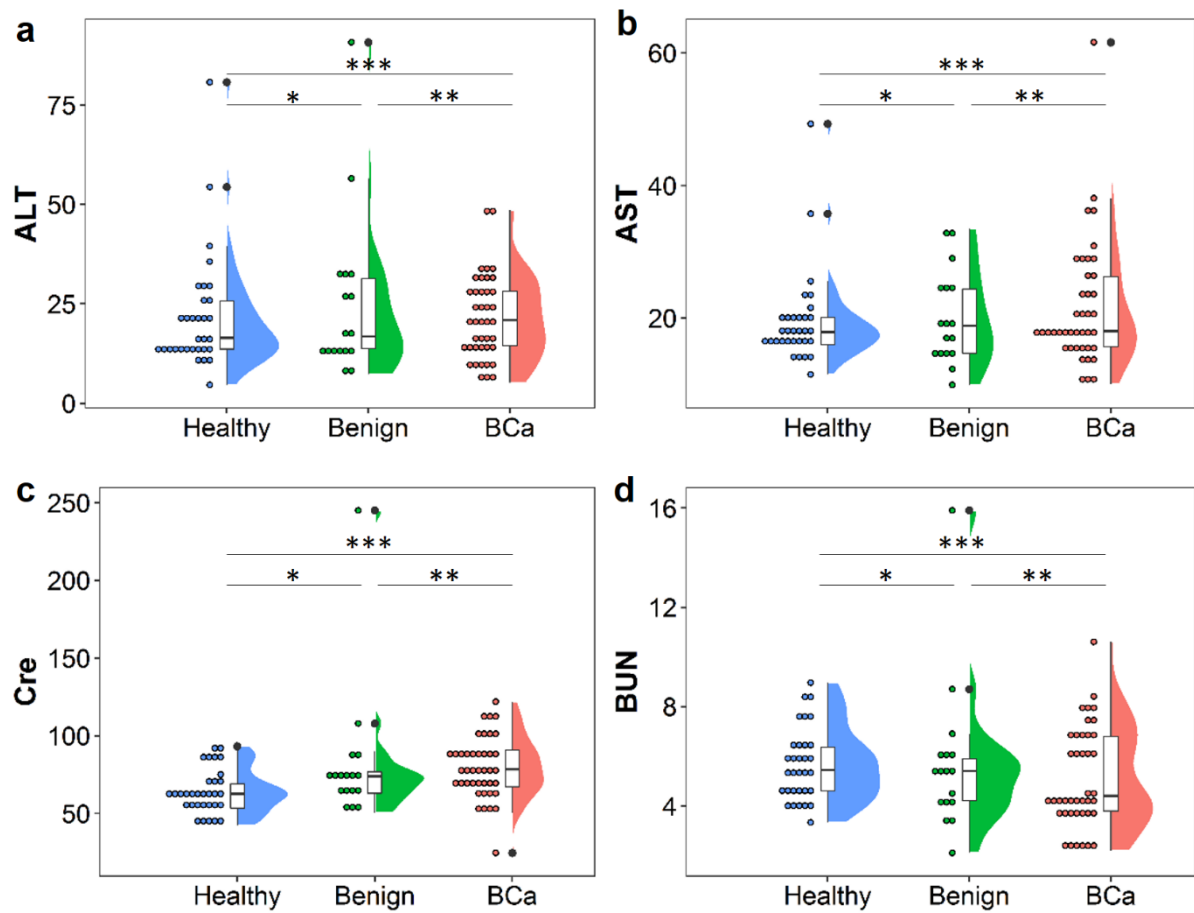

**Figure S1. Blood biochemical indexes for the three groups of study participants.** Each symbol presents an individual subject. **(a)** Glutamic-pyruvic transaminase (ALT) in blood.  $*P_a = 0.7950$ ,  $**P_a = 0.9024$ ,  $***P_a = 0.5231$ , Mann Whitney test. **(b)** Glutamic-oxalacetic transaminase (AST) in blood.  $*P_b = 0.8559$ ,  $**P_b = 0.6815$ ,  $***P_b = 0.4082$ , Mann Whitney test. **(c)** Creatinine (Cre) in blood.  $*P_c = 0.0436$ ,  $**P_c = 0.2359$ , Mann Whitney test;  $***P_c = 0.0006$ , unpaired Student's two-tailed  $t$ -test. **(d)** Urea nitrogen (BUN) in blood.  $*P_d = 0.4440$ ,  $**P_d = 0.7126$ ,  $***P_d = 0.1090$ , Mann Whitney test. It can be seen that, except for Cre, no significant difference was observed in blood biochemical indexes among different groups.

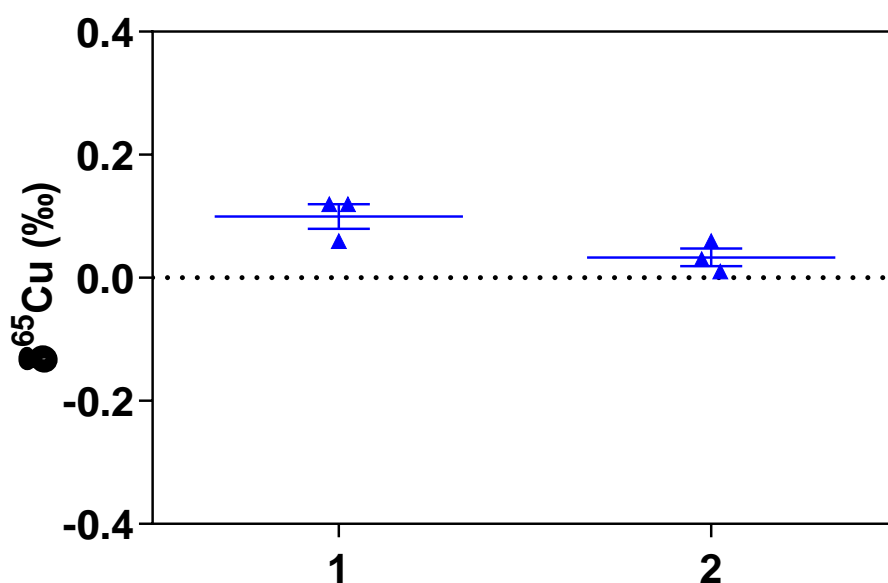

**Figure S2. Evaluation of performance of sample purification procedure toward complex biological matrix.** The experiments were carried out as follows: first, the biological samples were digested and purified by anion exchange column as described in the Experimental Section. Then, all the eluted fractions were collected and combined again except for the Cu fraction. In this way, we obtained a Cu-excluded sample that had the same composition with the original one but with no Cu. After that, an ERM-AE633 Cu standard solution was added to the Cu-excluded sample to obtain a final Cu concentration of  $\sim 1 \mu\text{g/mL}$ . The mixture was purified and analyzed again as described in the Experimental Section. Herein, **1** and **2** represent two batches of experiments and each batch consists of three parallel samples ( $n = 3$ ). As shown in this figure, the average  $\delta^{65}\text{Cu}$  values are  $0.10 \pm 0.03\text{‰}$  and  $0.03 \pm 0.03\text{‰}$  for batch **1** and **2**, respectively. These values are close to or less than the method uncertainty ( $0.1\text{‰}$ ), indicating that the biological matrix in samples has no influence on the Cu isotopic measurement in the present study.

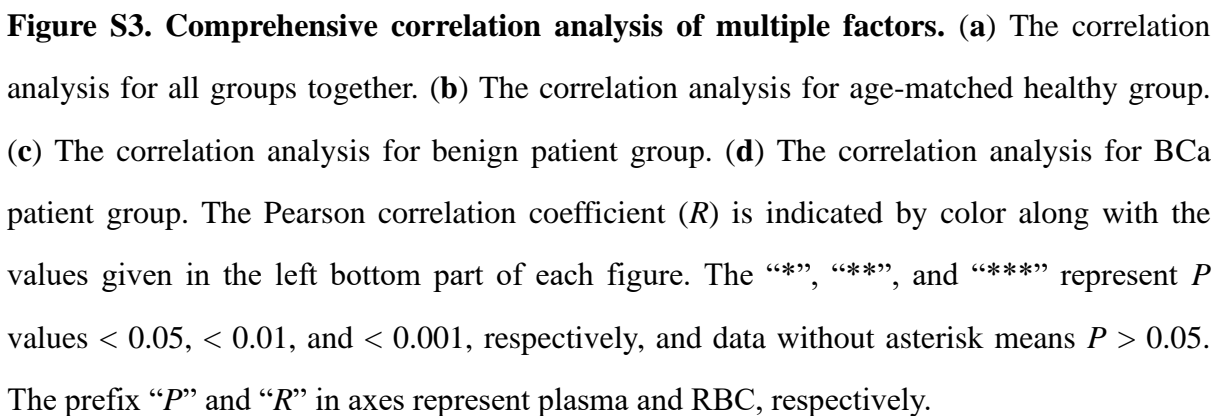

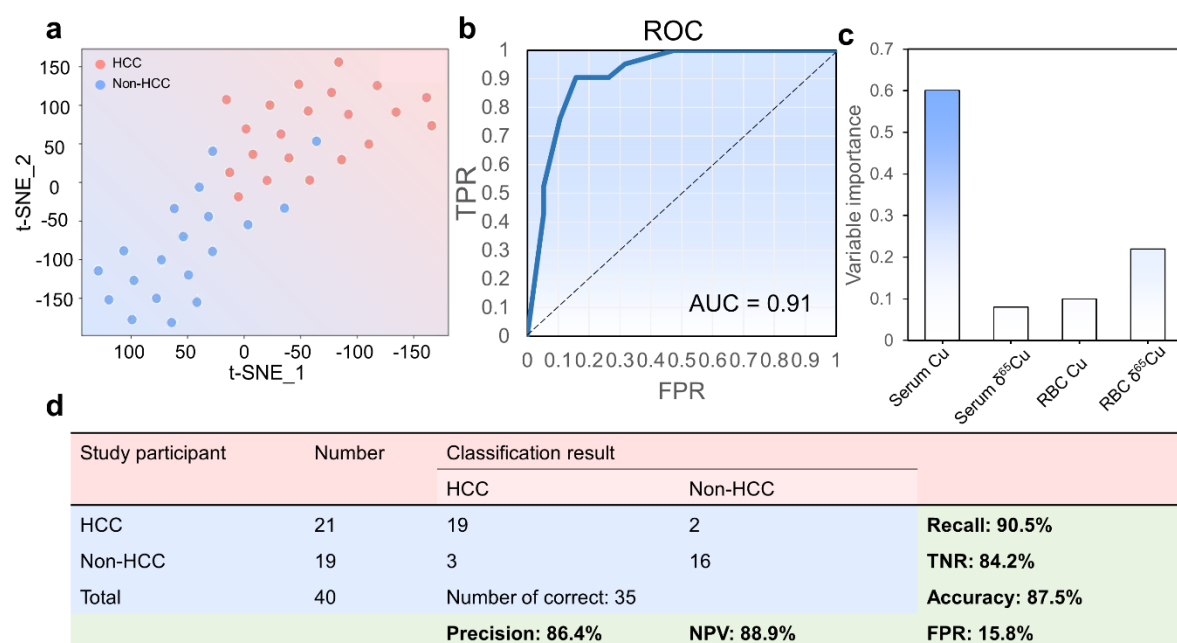

**Figure S4. Application of the machine learning model for classification of HCC and non-HCC subjects.** To test the universality of the machine learning model, we also applied the model to the previously published data of hepatocellular carcinoma (HCC) patients (the raw data are also given in Table S11).<sup>14</sup> (a) The t-SNE dimensionality reduction results with the four copper-related variables (serum Cu, RBC Cu, serum  $\delta^{65}\text{Cu}$  value, and RBC  $\delta^{65}\text{Cu}$  value). (b) The receiver-operating characteristic curve (ROC) of the random forest model. The area under the receiver operator curve (AUC) reached 0.91. (c) The variable importance of four Cu-related variables in the RF model. (d) Classification results and model performance. HCC means hepatocellular carcinoma and non-HCC means controls. The “number of correct” means the number of subjects with correct classification result. NPV: negative predictive value. TPR: true positive rate. FPR: false positive rate. TNR: true negative rate. It can be seen that the machine learning model established in the present study also worked well for hepatocellular carcinoma (HCC) with accuracy, recall, TNR, and FPR of 87.5, 90.5, 84.2, and 15.8%, respectively.

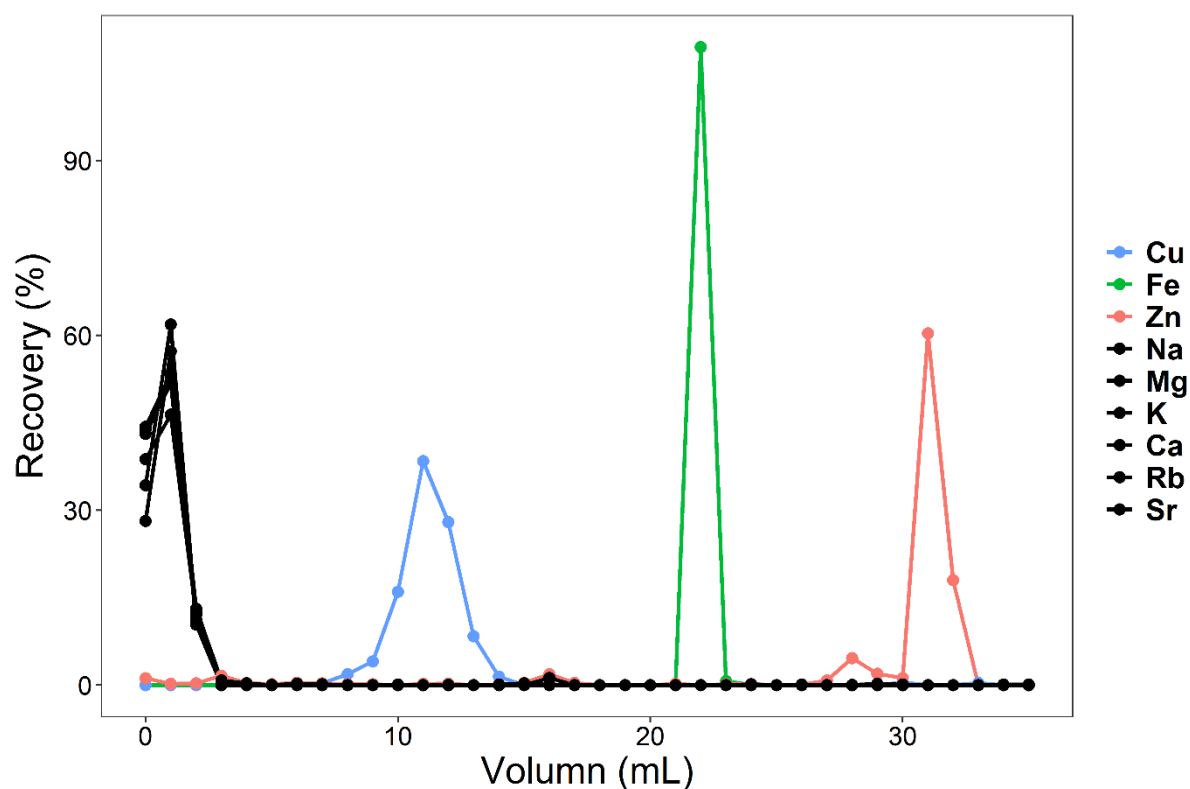

**Figure S5. Elution curve of Fe, Cu, and Zn from interfering ions in anion exchange column chromatography.** The elements were separated by an AG-MP-1M anion exchange resin column, and 8 mL of 8 M HCl + 0.001% H<sub>2</sub>O<sub>2</sub> solution was used to elute the matrix, 12 mL of 5 M HCl + 0.001% H<sub>2</sub>O<sub>2</sub> solution to elute Cu fraction, 7 mL of 0.6 M HCl solution to elute Fe fraction, and 8 mL of 0.7 M HNO<sub>3</sub> to elute Zn fraction. The elution curve indicates that Cu ions can be well separated from other interfering ions to ensure a high-precision MC-ICP-MS isotopic analysis.

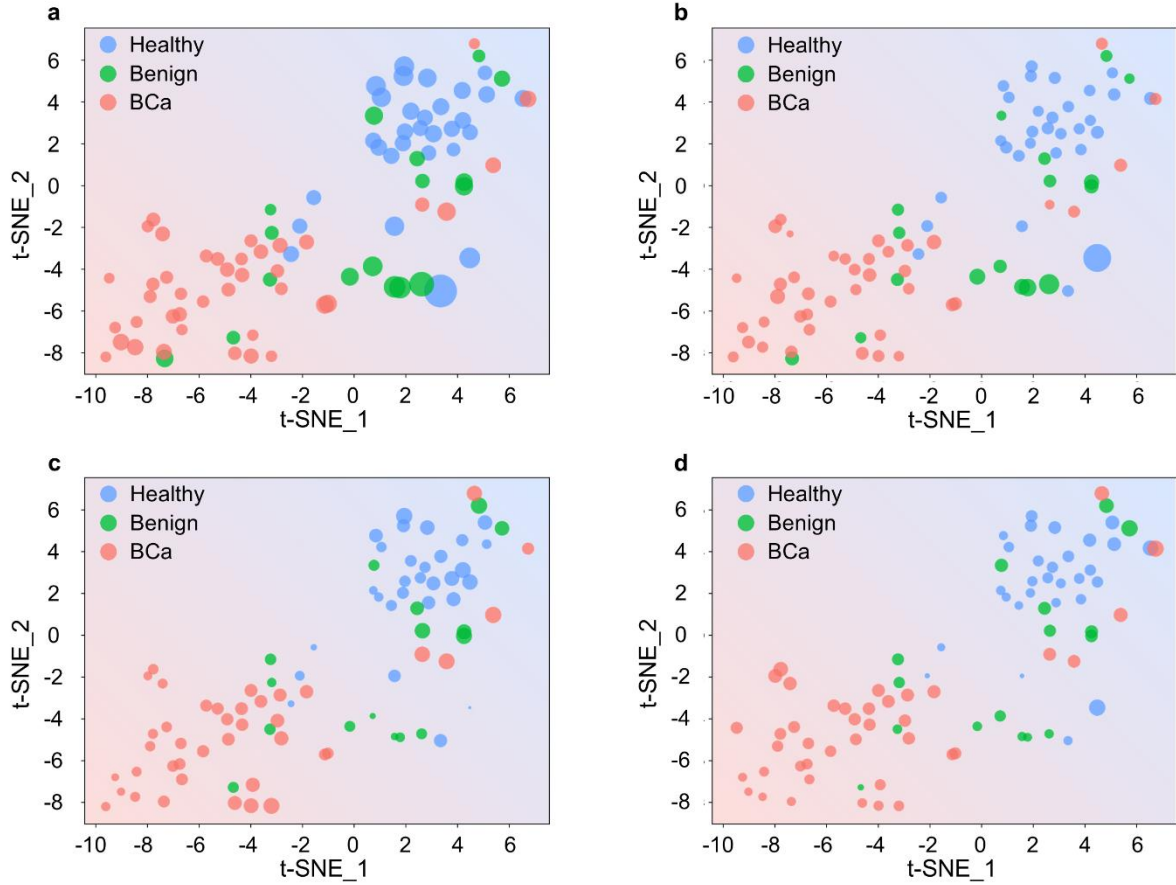

**Figure S6. The t-SNE visualization with intensity distribution of plasma copper concentration, RBC copper concentration, plasma  $\delta^{65}\text{Cu}$ , and RBC  $\delta^{65}\text{Cu}$ .** For all panels, the size of dots represents the intensity of variables in t-SNE. Because negative values of plasma  $\delta^{65}\text{Cu}$  and RBC  $\delta^{65}\text{Cu}$  cannot be represented by the dot size, the original data was rescaled to the range 0-1 (min-max normalization). **(a)** The intensity distribution of plasma copper concentration. **(b)** The intensity distribution of RBC copper concentration. **(c)** The intensity distribution of plasma  $\delta^{65}\text{Cu}$ . **(d)** The intensity distribution of RBC  $\delta^{65}\text{Cu}$ .

## 5. References for SI

1. L. Van Heghe, E. Engstrom, I. Rodushkin, C. Cloquet and F. Vanhaecke, *J. Anal. At. Spectrom.*, 2012, **27**, 1327-1334.
2. L. Yang, *Mass Spectrom. Rev.*, 2009, **28**, 990-1011.
3. F. Albarede, P. Telouk, J. Blichert-Toft, M. Boyet, A. Agranier and B. Nelson, *Geochim. Cosmochim. Acta*, 2004, **68**, 2725-2744.
4. H. Yuan, W. Yuan, Z. Bao, K. Chen, F. Huang and S. Liu, *Geostand. Geoanal. Res.*, 2017, **41**, 77-84.
5. J. Li, S.-h. Tang, X.-k. Zhu, Z.-h. Li, S.-Z. Li, B. Yan, Y. Wang, J. Sun, Y. Shi, A. Dong, N. S. Belshaw, X. Zhang, S.-a. Liu, J.-h. Liu, D. Wang, S.-y. Jiang, K. Hou and A. S. Cohen, *Geostand. Geoanal. Res.*, 2019, **43**, 163-175.
6. L. Sauzeat, M. Costas-Rodriguez, E. Albalat, N. Mattielli, F. Vanhaecke and V. Balter, *Talanta*, 2021, **221**.
7. T. Shi and S. Horvath, *J. Comput. Graph. Statist.*, 2006, **15**, 118-138.
8. D. W. Zimmerman and B. D. Zumbo, *Can. J. Exper. Psychol.*, 1993, **47**, 523-539.
9. E. Skovlund and G. U. Fenstad, *J. Clin. Epidemiol.*, 2001, **54**, 86-92.
10. M. W. Fagerland and L. Sandvik, *Contemp. Clin. Trials*, 2009, **30**, 490-496.
11. B.-E. Kim, T. Nevitt and D. J. Thiele, *Nat. Chem. Biol.*, 2008, **4**, 176-185.
12. X. K. Zhu, Y. Guo, R. J. P. Williams, R. K. O'Nions, A. Matthews, N. S. Belshaw, G. W. Canters, E. C. de Waal, U. Weser, B. K. Burgess and B. Salvato, *Earth Planet. Sci. Lett.*, 2002, **200**, 47-62.
13. *EAU Guidelines on Non-muscle-invasive Bladder Cancer (TaT1 and CIS)*, European Association of Urology, 2018.
14. V. Balter, A. N. da Costa, V. P. Bondanese, K. Jaouen, A. Lamboux, S. Sangrajang, N. Vincent, F. Fourel, P. Telouk, M. Gigou, C. Lecuyer, P. Srivatanakul, C. Brechot, F. Albarede and P. Hainaut, *Proc. Natl. Acad. Sci. U.S.A.*, 2015, **112**, 982-985.
